# Supplementary material for: Isoproterenol-Induced Permeability Transition Pore-Related Dysfunction of Heart Mitochondria Is Attenuated by Astaxanthin
Source: PubMed Central journal article supplement (PMC7589423; doi:10.3390/biomedicines8100437), 2020-10-20
Supplement: biomedicines-08-00437-s001.pdf [file biomedicines-08-00437-s001.pdf]

To Fig 1.

# Histology

|        | group 1 | group 2 | group 3 | group 4 |
|--------|---------|---------|---------|---------|
| Mean 1 | -2.3625 | -0.7098 | 30.3102 | 11.5002 |
| Mean 2 | -0.7715 | -3.7087 | 23.664  | 8.401   |
| Mean 3 | 1.8492  | -3.4398 | 28.1929 | 9.4729  |
| Mean 4 | 0.9683  | -4.181  | 17.0851 | 8.5077  |
| Mean 5 | 0.3163  | -1.2238 | 32.0199 | 18.8683 |

## One Way Analysis of Variance All Pairwise Multiple Comparison Procedures (Student-Newman-Keuls Method) :

| Comparison          | Diff of Means | P<0.050 |
|---------------------|---------------|---------|
| Group 2 vs. Group 1 | 2.653         | No      |
| Group 3 vs. Group 1 | 26.254        | Yes     |
| Group 4 vs. Group 1 | 11.35         | Yes     |
| Group 4 vs. Group 3 | 14.904        | Yes     |

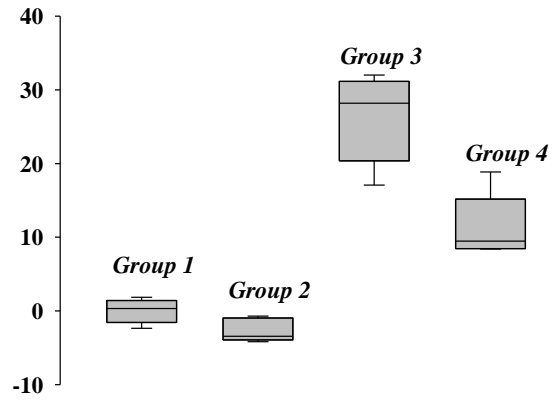

To Fig 2.

CV

b

CIII

c

|        | Group 1 (w/o adds) |                   | Group 2 (AST) |                   | Group 3 (ISO) |                   | Group 4 (ISO+AST) |                   | Group 1 (w/o adds) |                   | Group 2 (AST) |                   | Group 3 (ISO) |                   | Group 4 (ISO+AST) |                   |
|--------|--------------------|-------------------|---------------|-------------------|---------------|-------------------|-------------------|-------------------|--------------------|-------------------|---------------|-------------------|---------------|-------------------|-------------------|-------------------|
|        | Control            | +Ca <sup>2+</sup> | Control       | +Ca <sup>2+</sup> | Control       | +Ca <sup>2+</sup> | Control           | +Ca <sup>2+</sup> | Control            | +Ca <sup>2+</sup> | Control       | +Ca <sup>2+</sup> | Control       | +Ca <sup>2+</sup> | Control           | +Ca <sup>2+</sup> |
|        | Col 1              | Col 2             | Col 3         | Col 4             | Col 5         | Col 6             | Col 7             | Col 8             | Col 1              | Col 2             | Col 3         | Col 4             | Col 5         | Col 6             | Col 7             | Col 8             |
| Mean 1 | 0.9445             | 0.8957            | 0.9662        | 0.7402            | 0.4346        | 0.454             | 0.8182            | 0.8822            | 1.0162             | 0.9729            | 0.8654        | 0.8373            | 0.4418        | 0.4702            | 0.8438            | 1.0474            |
| Mean 2 | 0.9653             | 0.9741            | 1.015         | 0.7833            | 0.4498        | 0.3593            | 0.7779            | 0.9534            | 0.9822             | 0.9617            | 0.8656        | 1.0032            | 0.3551        | 0.3408            | 0.8487            | 0.9309            |
| Mean 3 | 1.0897             | 0.8979            | 1.084         | 0.9576            | 0.5369        | 0.492             | 0.8303            | 0.9817            | 1.0017             | 1.0917            | 0.9699        | 1.0917            | 0.3931        | 0.4618            | 0.9307            | 1.0997            |

CV

CIII

CIV

CII

CI

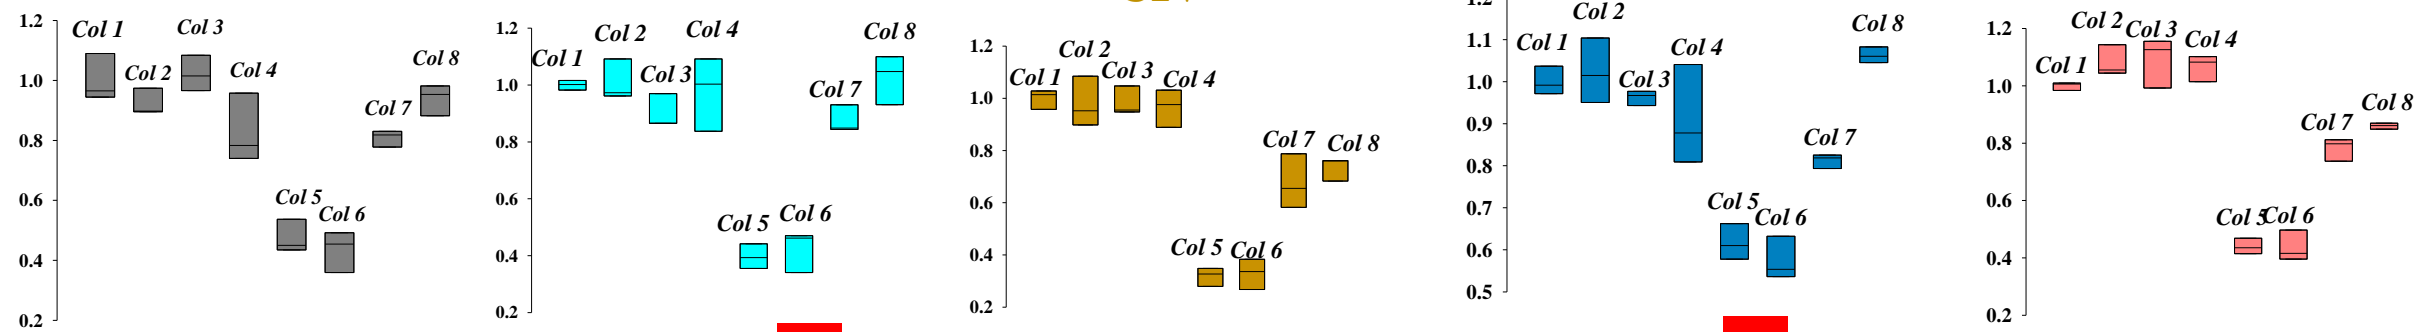

CIV

d

CII

e

|        | Group 1 (w/o adds) |                   | Group 2 (AST) |                   | Group 3 (ISO) |                   | Group 4 (ISO+AST) |                   | Group 1 (w/o adds) |                   | Group 2 (AST) |                   | Group 3 (ISO) |                   | Group 4 (ISO+AST) |                   |
|--------|--------------------|-------------------|---------------|-------------------|---------------|-------------------|-------------------|-------------------|--------------------|-------------------|---------------|-------------------|---------------|-------------------|-------------------|-------------------|
|        | Control            | +Ca <sup>2+</sup> | Control       | +Ca <sup>2+</sup> | Control       | +Ca <sup>2+</sup> | Control           | +Ca <sup>2+</sup> | Control            | +Ca <sup>2+</sup> | Control       | +Ca <sup>2+</sup> | Control       | +Ca <sup>2+</sup> | Control           | +Ca <sup>2+</sup> |
|        | Col 1              | Col 2             | Col 3         | Col 4             | Col 5         | Col 6             | Col 7             | Col 8             | Col 1              | Col 2             | Col 3         | Col 4             | Col 5         | Col 6             | Col 7             | Col 8             |
| Mean 1 | 1.0283             | 1.0846            | 1.0473        | 1.0315            | 0.3268        | 0.3833            | 0.655             | 0.7602            | 1.0368             | 0.9506            | 0.9771        | 1.0409            | 0.6102        | 0.5537            | 0.8189            | 1.0455            |
| Mean 2 | 0.9578             | 0.8982            | 0.9551        | 0.889             | 0.2793        | 0.2675            | 0.7878            | 0.7615            | 0.9715             | 1.0149            | 0.9432        | 0.809             | 0.5778        | 0.5362            | 0.8254            | 1.0827            |
| Mean 3 | 1.014              | 0.9523            | 0.9478        | 0.9759            | 0.3484        | 0.3363            | 0.5822            | 0.683             | 0.9917             | 1.1039            | 0.9671        | 0.8781            | 0.6623        | 0.6323            | 0.7933            | 1.0603            |

f

CI

|        | Group 1 (w/o adds) |                   | Group 2 (AST) |                   | Group 3 (ISO) |                   | Group 4 (ISO+AST) |                   |
|--------|--------------------|-------------------|---------------|-------------------|---------------|-------------------|-------------------|-------------------|
|        | Control            | +Ca <sup>2+</sup> | Control       | +Ca <sup>2+</sup> | Control       | +Ca <sup>2+</sup> | Control           | +Ca <sup>2+</sup> |
|        | Col 1              | Col 2             | Col 3         | Col 4             | Col 5         | Col 6             | Col 7             | Col 8             |
| Mean 1 | 1.0064             | 1.0552            | 0.9925        | 1.0145            | 0.4353        | 0.497             | 0.7978            | 0.8491            |
| Mean 2 | 1.0097             | 1.1435            | 1.1261        | 1.0826            | 0.4145        | 0.4157            | 0.7374            | 0.8616            |
| Mean 3 | 0.9838             | 1.0445            | 1.1554        | 1.1019            | 0.4686        | 0.3958            | 0.8122            | 0.8698            |

One Way Analysis of Variance All Pairwise Multiple Comparison Procedures (Student-Newman-Keuls Method) :

**b** CV

| Comparison      | Diff of Means | P<0.050 |
|-----------------|---------------|---------|
| Col 3 vs. Col 1 | 0.0219        | No      |
| Col 5 vs. Col 1 | 0.526         | Yes     |
| Col 7 vs. Col 1 | 0.191         | Yes     |
| Col 7 vs. Col 5 | 0.335         | Yes     |
| Col 4 vs. Col 2 | 0.0956        | No      |
| Col 6 vs. Col 2 | 0.487         | Yes     |
| Col 8 vs. Col 2 | 0.0165        | No      |
| Col 8 vs. Col 6 | 0.504         | Yes     |

**c** CIII

| Comparison      | Diff of Means | P<0.050 |
|-----------------|---------------|---------|
| Col 3 vs. Col 1 | 0.0997        | No      |
| Col 5 vs. Col 1 | 0.603         | Yes     |
| Col 7 vs. Col 1 | 0.126         | Yes     |
| Col 7 vs. Col 5 | 0.478         | Yes     |
| Col 4 vs. Col 2 | 0.0314        | No      |
| Col 6 vs. Col 2 | 0.585         | Yes     |
| Col 8 vs. Col 2 | 0.0172        | No      |
| Col 8 vs. Col 6 | 0.602         | Yes     |

**d** CIV

| Comparison      | Diff of Means | P<0.050 |
|-----------------|---------------|---------|
| Col 3 vs. Col 1 | 0.0167        | No      |
| Col 5 vs. Col 1 | 0.682         | Yes     |
| Col 7 vs. Col 1 | 0.325         | Yes     |
| Col 7 vs. Col 5 | 0.357         | Yes     |
| Col 4 vs. Col 2 | 0.0129        | No      |
| Col 6 vs. Col 2 | 0.649         | Yes     |
| Col 8 vs. Col 2 | 0.243         | Yes     |
| Col 8 vs. Col 6 | 0.406         | Yes     |

**e** CII

| Comparison      | Diff of Means | P<0.050 |
|-----------------|---------------|---------|
| Col 3 vs. Col 1 | 0.0375        | No      |
| Col 5 vs. Col 1 | 0.383         | Yes     |
| Col 7 vs. Col 1 | 0.187         | Yes     |
| Col 7 vs. Col 5 | 0.196         | Yes     |
| Col 4 vs. Col 2 | 0.114         | No      |
| Col 6 vs. Col 2 | 0.449         | Yes     |
| Col 8 vs. Col 2 | 0.0397        | No      |
| Col 8 vs. Col 6 | 0.243         | Yes     |

**f** CI

| Comparison      | Diff of Means | P<0.050 |
|-----------------|---------------|---------|
| Col 3 vs. Col 1 | 0.0914        | No      |
| Col 5 vs. Col 1 | 0.56          | Yes     |
| Col 7 vs. Col 1 | 0.218         | Yes     |
| Col 7 vs. Col 5 | 0.343         | Yes     |
| Col 4 vs. Col 2 | 0.0148        | No      |
| Col 6 vs. Col 2 | 0.645         | Yes     |
| Col 8 vs. Col 2 | 0.221         | Yes     |
| Col 8 vs. Col 6 | 0.424         | Yes     |

|        | a EGTA   |          |          |         | b Ca <sup>2+</sup> |          |          |          | c Antimycin A |          |          |          | Menadion |          |          |          |
|--------|----------|----------|----------|---------|--------------------|----------|----------|----------|---------------|----------|----------|----------|----------|----------|----------|----------|
|        | group 1  | group 2  | group 3  | group 4 | group 1            | group 2  | group 3  | group 4  | group 1       | group 2  | group 3  | group 4  | group 1  | group 2  | group 3  | group 4  |
| Mean 1 | 153.254  | 155.076  | 154.2425 | 153.985 | 221.1721           | 468.3049 | 349.2489 | 362.6013 | 3065.839      | 2675.2   | 1257.54  | 1738.745 | 3065.839 | 2675.2   | 1257.54  | 1738.745 |
| Mean 2 | 211.32   | 247.8493 | 201.1665 | 247.021 | 218.4544           | 348.2448 | 303.0058 | 272.8328 | 3034.017      | 2233.789 | 1998.255 | 1283.949 | 3034.017 | 2233.789 | 1998.255 | 1283.949 |
| Mean 3 | 168.2341 | 180.2    | 175.591  | 187.24  | 219.2125           | 421.1324 | 311.5495 | 300.8622 | 2287.21       | 2721.132 | 1311.515 | 1750.334 | 2287.21  | 2721.132 | 1311.515 | 1750.334 |
| Mean 4 | 178.2    | 222.3907 | 156.8632 | 200.2   | 215.022            | 397.0241 | 345.52   | 335.2542 | 2157.54       | 2297.024 | 1045.52  | 1274.35  | 2157.54  | 2297.024 | 1045.52  | 1274.35  |

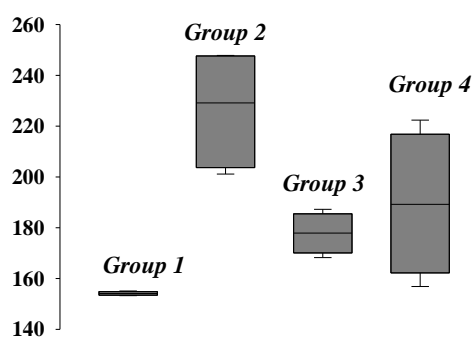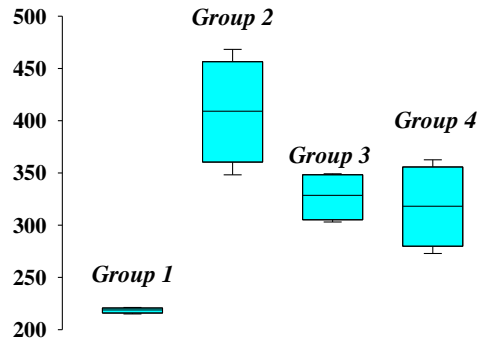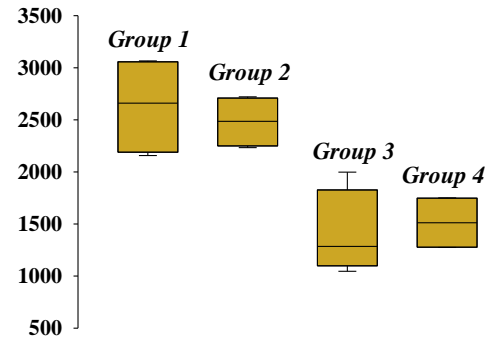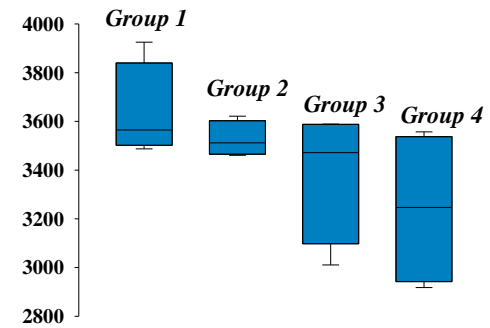

EGTA

Ca<sup>2+</sup>

Antimycin A

Menadion

| Comparison          | Diff of Means | P<0.050 |
|---------------------|---------------|---------|
| Group 2 vs. Group 1 | 72.7          | Yes     |
| Group 3 vs. Group 1 | 23.677        | Yes     |
| Group 4 vs. Group 1 | 35.274        | No      |
| Group 4 vs. Group 3 | 11.597        | No      |

| Comparison          | Diff of Means | P<0.050 |
|---------------------|---------------|---------|
| Group 2 vs. Group 1 | 190.211       | Yes     |
| Group 3 vs. Group 1 | 108.866       | Yes     |
| Group 4 vs. Group 1 | 99.422        | No      |
| Group 4 vs. Group 3 | 9.443         | No      |

| Comparison          | Diff of Means | P<0.050 |
|---------------------|---------------|---------|
| Group 2 vs. Group 1 | 154.365       | No      |
| Group 3 vs. Group 1 | 1232.944      | Yes     |
| Group 4 vs. Group 1 | 1124.307      | Yes     |
| Group 4 vs. Group 3 | 108.637       | No      |

| Comparison          | Diff of Means | P<0.050 |
|---------------------|---------------|---------|
| Group 2 vs. Group 1 | -             | No      |
| Group 3 vs. Group 1 | -             | No      |
| Group 4 vs. Group 1 | -             | No      |
| Group 4 vs. Group 3 | -             | No      |

To Fig 4.

|        | Group 1 (w/o adds) |                         | Group 2 (AST) |                         | Group 3 (ISO) |                         | Group 4 (ISO+AST) |                         |
|--------|--------------------|-------------------------|---------------|-------------------------|---------------|-------------------------|-------------------|-------------------------|
|        | EGTA Col 1         | +Ca <sup>2+</sup> Col 2 | EGTA Col 3    | +Ca <sup>2+</sup> Col 4 | EGTA Col 5    | +Ca <sup>2+</sup> Col 6 | EGTA Col 7        | +Ca <sup>2+</sup> Col 8 |
| Mean 1 | 5967.334           | 6669.512                | 4054.999      | 5091.304                | 8475.932      | 7761.909                | 7527.677          | 6831.394                |
| Mean 2 | 6296.909           | 6381.048                | 4306.862      | 4947.647                | 7500.807      | 10961.18                | 5521.749          | 6484.883                |
| Mean 3 | 6425.54            | 6785.24                 | 4287.014      | 4789.665                | 7147.54       | 10012.36                | 6011.64           | 6875.65                 |
| Mean 4 | 5987.35            | 6375.001                | 4585.015      | 4778.644                | 8201.225      | 7541.35                 | 6247.465          | 6587.001                |

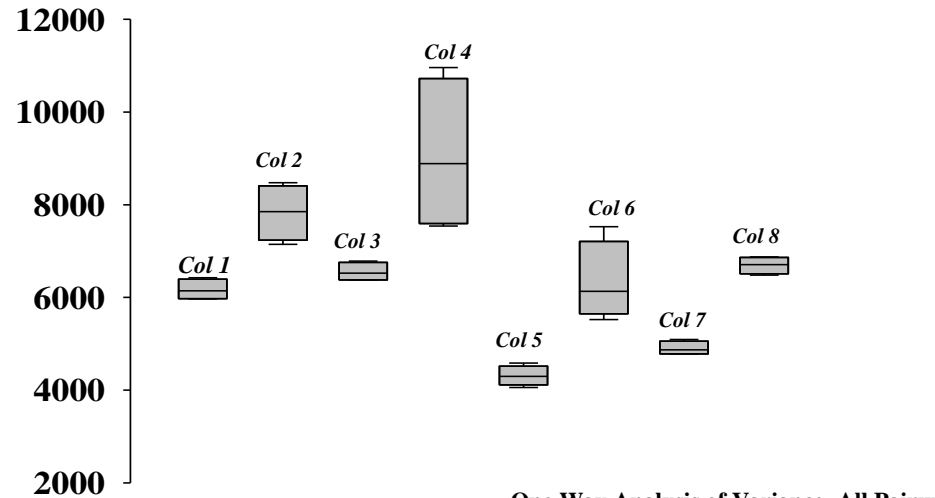

One Way Analysis of Variance All Pairwise Multiple Comparison Procedures (Student-Newman-Keuls Method) :

| Comparison      | Diff of Means | P<0.050 |
|-----------------|---------------|---------|
| Col 3 vs. Col 1 | 383.417       | No      |
| Col 5 vs. Col 1 | 1860.811      | Yes     |
| Col 7 vs. Col 1 | 1267.468      | Yes     |
| Col 7 vs. Col 5 | 593.343       | Yes     |
| Col 4 vs. Col 2 | 1237.824      | No      |
| Col 6 vs. Col 2 | 1504.243      | Yes     |
| Col 8 vs. Col 2 | 1136.644      | Yes     |
| Col 8 vs. Col 6 | 367.599       | No      |

|        | group 1 | group 2 | group 3 | group 4 |
|--------|---------|---------|---------|---------|
| Mean 1 | 35.2    | 45.45   | 30.5    | 35.71   |
| Mean 2 | 35.7    | 42.6    | 22.7    | 37.7    |
| Mean 3 | 34.9    | 46      | 19      | 34.8    |
| Mean 4 | 35.9    | 43.9    | 18.9    | 34.9    |

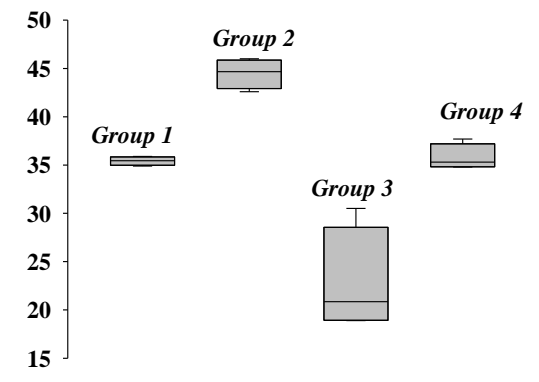

| Comparison          | Diff of Means | P<0.050 |
|---------------------|---------------|---------|
| Group 2 vs. Group 1 | 9.063         | Yes     |
| Group 3 vs. Group 1 | 12.650        | Yes     |
| Group 4 vs. Group 1 | 0.353         | No      |
| Group 4 vs. Group 3 | 13.003        | Yes     |

C

SOD2

|        | Group 1 (w/o adds) |                         | Group 2 (AST) |                         | Group 3 (ISO) |                         | Group 4 (ISO+AST) |                         |
|--------|--------------------|-------------------------|---------------|-------------------------|---------------|-------------------------|-------------------|-------------------------|
|        | Control Col 1      | +Ca <sup>2+</sup> Col 2 | Control Col 3 | +Ca <sup>2+</sup> Col 4 | Control Col 5 | +Ca <sup>2+</sup> Col 6 | Control Col 7     | +Ca <sup>2+</sup> Col 8 |
| Mean 1 | 1.0395             | 0.9847                  | 1.3316        | 1.3107                  | 0.5844        | 0.6426                  | 1.9294            | 2.6305                  |
| Mean 2 | 0.9677             | 1.0954                  | 1.4384        | 1.3609                  | 0.6614        | 0.6148                  | 1.9369            | 2.3655                  |
| Mean 3 | 0.993              | 0.9849                  | 1.505         | 1.2295                  | 0.4472        | 0.5108                  | 1.6923            | 2.7463                  |

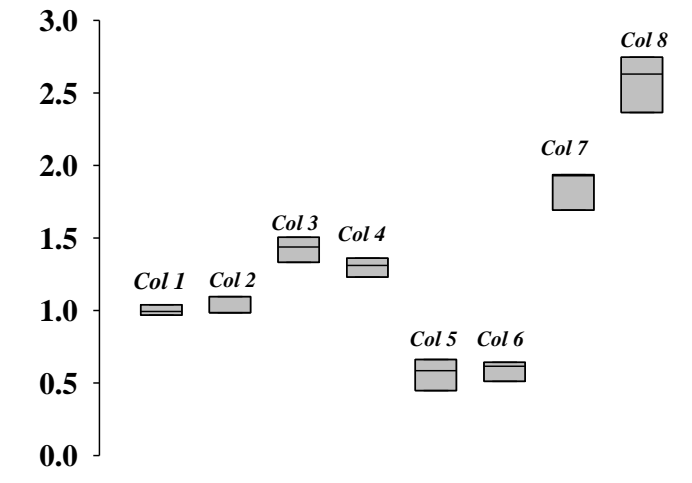

| Comparison      | Diff of Means | P<0.050 |
|-----------------|---------------|---------|
| Col 3 vs. Col 1 | 0.425         | Yes     |
| Col 5 vs. Col 1 | 0.436         | Yes     |
| Col 7 vs. Col 1 | 0.853         | Yes     |
| Col 7 vs. Col 5 | 1.289         | Yes     |
| Col 4 vs. Col 2 | 0.279         | Yes     |
| Col 6 vs. Col 2 | 0.432         | Yes     |
| Col 8 vs. Col 2 | 1.559         | Yes     |
| Col 8 vs. Col 6 | 1.991         | Yes     |

e

CRC

|        | group 1 | group 2 | group 3 | group 4 |
|--------|---------|---------|---------|---------|
| Mean 1 | 150     | 215     | 50      | 200     |
| Mean 2 | 185     | 150     | 150     | 170     |
| Mean 3 | 160     | 220     | 80      | 170     |
| Mean 4 | 170     | 190     | 130     | 190     |
| Mean 5 | 180     | 180     | 100     | 210     |

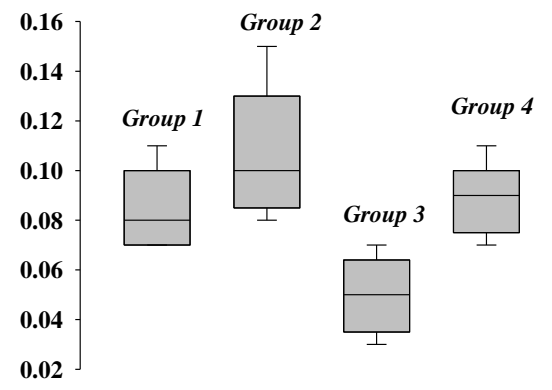

One Way Analysis of Variance All Pairwise Multiple Comparison Procedures (Student-Newman-Keuls Method) :

| Comparison          | Diff of Means | P<0.050 |
|---------------------|---------------|---------|
| Group 2 vs. Group 1 | 22            | No      |
| Group 3 vs. Group 1 | 67            | Yes     |
| Group 4 vs. Group 1 | 19            | No      |
| Group 4 vs. Group 3 | 67            | Yes     |

f

√TPP+

|        | group 1 | group 2 | group 3 | group 4 |
|--------|---------|---------|---------|---------|
| Mean 1 | 0.07    | 0.15    | 0.04    | 0.09    |
| Mean 2 | 0.07    | 0.11    | 0.03    | 0.11    |
| Mean 3 | 0.11    | 0.09    | 0.05    | 0.07    |
| Mean 4 | 0.09    | 0.08    | 0.07    | 0.08    |
| Mean 5 | 0.08    | 0.1     | 0.058   | 0.09    |

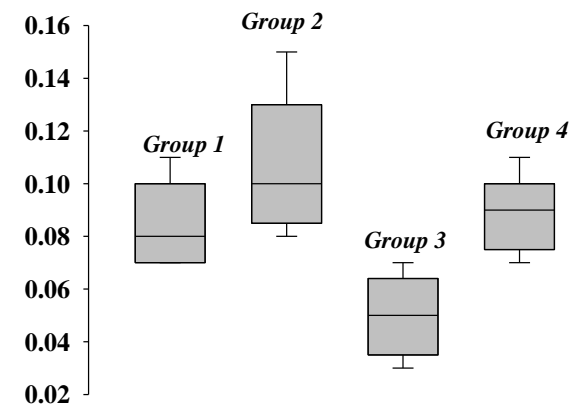

| Comparison          | Diff of Means | P<0.050 |
|---------------------|---------------|---------|
| Group 2 vs. Group 1 | 0.022         | No      |
| Group 3 vs. Group 1 | 0.0344        | Yes     |
| Group 4 vs. Group 1 | 0.004         | No      |
| Group 4 vs. Group 3 | 0.0384        | Yes     |

## Swelling $T_{1/2}$

|        | group 1 | group 2 | group 3 | group 4 |
|--------|---------|---------|---------|---------|
| Mean 1 | 207     | 310     | 61      | 326     |
| Mean 2 | 254     | 335     | 65      | 393     |
| Mean 3 | 262     | 365     | 124     | 411     |
| Mean 4 | 246     | 282     | 106     | 355     |
| Mean 5 | 262     | 305     | 102     | 336     |

One Way Analysis of Variance All Pairwise Multiple Comparison Procedures (Student-Newman-Keuls Method) :

| Comparison          | Diff of Means | P<0.050 |
|---------------------|---------------|---------|
| Group 2 vs. Group 1 | 6.072         | Yes     |
| Group 3 vs. Group 1 | 137.833       | Yes     |
| Group 4 vs. Group 1 | 127.5         | Yes     |
| Group 4 vs. Group 3 | 265.333       | Yes     |

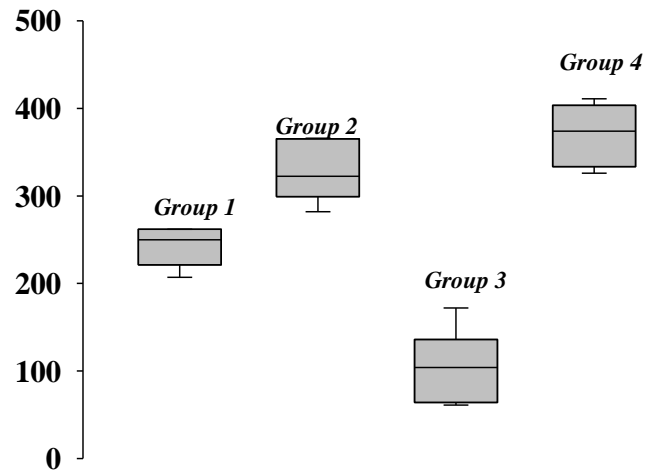

**b** ANT

**c** VDAC

|        | Group 1 (w/o adds) |                   | Group 2 (AST) |                   | Group 3 (ISO) |                   | Group 4 (ISO+AST) |                   | Group 1 (w/o adds) |                   | Group 2 (AST) |                   | Group 3 (ISO) |                   | Group 4 (ISO+AST) |                   |
|--------|--------------------|-------------------|---------------|-------------------|---------------|-------------------|-------------------|-------------------|--------------------|-------------------|---------------|-------------------|---------------|-------------------|-------------------|-------------------|
|        | Control            | +Ca <sup>2+</sup> | Control       | +Ca <sup>2+</sup> | Control       | +Ca <sup>2+</sup> | Control           | +Ca <sup>2+</sup> | Control            | +Ca <sup>2+</sup> | Control       | +Ca <sup>2+</sup> | Control       | +Ca <sup>2+</sup> | Control           | +Ca <sup>2+</sup> |
|        | Col 1              | Col 2             | Col 3         | Col 4             | Col 5         | Col 6             | Col 7             | Col 8             | Col 1              | Col 2             | Col 3         | Col 4             | Col 5         | Col 6             | Col 7             | Col 8             |
| Mean 1 | 1.0039             | 0.8421            | 0.9488        | 1.276             | 0.4563        | 0.4475            | 1.9193            | 1.9456            | 1.0236             | 1.0875            | 1.1129        | 0.9503            | 0.3838        | 0.4844            | 1.0717            | 1.12              |
| Mean 2 | 1.0197             | 0.9655            | 1.0534        | 1.2078            | 0.5333        | 0.5344            | 2.4225            | 2.4364            | 1.1042             | 1.1775            | 1.2265        | 1.2327            | 0.5788        | 0.4956            | 0.986             | 1.0601            |
| Mean 3 | 0.9764             | 0.9739            | 0.8974        | 1.2017            | 0.4752        | 0.5162            | 2.3444            | 2.1884            | 0.992              | 1.1004            | 1.1448        | 1.1183            | 0.5232        | 0.5134            | 1.0339            | 0.9432            |

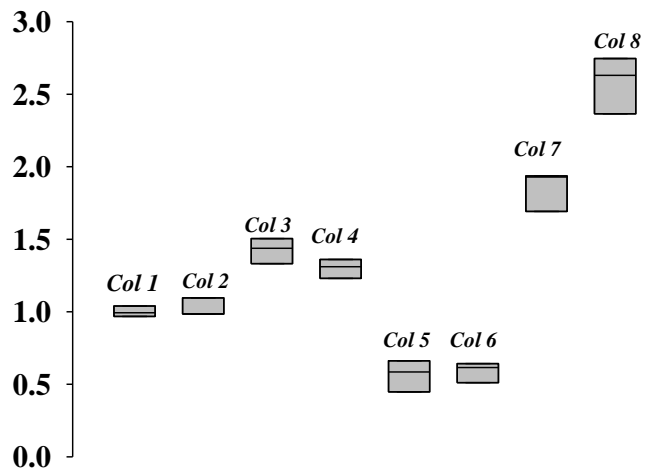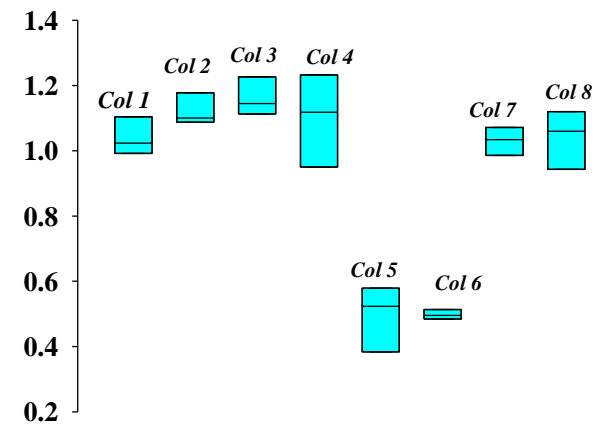

One Way Analysis of Variance All Pairwise Multiple Comparison Procedures (Student-Newman-Keuls Method) :

ANT

| Comparison      | Diff of Means | P<0.050 |
|-----------------|---------------|---------|
| Col 3 vs. Col 1 | 0.0335        | No      |
| Col 5 vs. Col 1 | 0.512         | Yes     |
| Col 7 vs. Col 1 | 1.229         | Yes     |
| Col 7 vs. Col 5 | 1.74          | Yes     |
| Col 4 vs. Col 2 | 0.301         | Yes     |
| Col 6 vs. Col 2 | 0.428         | Yes     |
| Col 8 vs. Col 2 | 1.263         | Yes     |
| Col 8 vs. Col 6 | 1.691         | Yes     |

VDAC

| Comparison      | Diff of Means | P<0.050 |
|-----------------|---------------|---------|
| Col 3 vs. Col 1 | 0.121         | No      |
| Col 5 vs. Col 1 | 0.545         | Yes     |
| Col 7 vs. Col 1 | 0.00938       | No      |
| Col 7 vs. Col 5 | 0.535         | Yes     |
| Col 4 vs. Col 2 | 0.0214        | No      |
| Col 6 vs. Col 2 | 0.624         | Yes     |
| Col 8 vs. Col 2 | 0.0807        | No      |
| Col 8 vs. Col 6 | 0.543         | Yes     |



**b** CNPase

**c** Sub b

**d** Sub c

|        | Group 1 (w/o adds) |                         | Group 2 (AST) |                         | Group 3 (ISO) |                         | Group 4 (ISO+AST) |                         | Group 1 (w/o adds) |                         | Group 2 (AST) |                         | Group 3 (ISO) |                         | Group 4 (ISO+AST) |                         | Group 1 (w/o adds) |                         | Group 2 (AST) |                         | Group 3 (ISO) |                         | Group 4 (ISO+AST) |                         |
|--------|--------------------|-------------------------|---------------|-------------------------|---------------|-------------------------|-------------------|-------------------------|--------------------|-------------------------|---------------|-------------------------|---------------|-------------------------|-------------------|-------------------------|--------------------|-------------------------|---------------|-------------------------|---------------|-------------------------|-------------------|-------------------------|
|        | Control Col 1      | +Ca <sup>2+</sup> Col 2 | Control Col 3 | +Ca <sup>2+</sup> Col 4 | Control Col 5 | +Ca <sup>2+</sup> Col 6 | Control Col 7     | +Ca <sup>2+</sup> Col 8 | Control Col 1      | +Ca <sup>2+</sup> Col 2 | Control Col 3 | +Ca <sup>2+</sup> Col 4 | Control Col 5 | +Ca <sup>2+</sup> Col 6 | Control Col 7     | +Ca <sup>2+</sup> Col 8 | Control Col 1      | +Ca <sup>2+</sup> Col 2 | Control Col 3 | +Ca <sup>2+</sup> Col 4 | Control Col 5 | +Ca <sup>2+</sup> Col 6 | Control Col 7     | +Ca <sup>2+</sup> Col 8 |
| Mean 1 | 1.0441             | 1.0915                  | 1.5853        | 1.491                   | 1.003         | 1.0985                  | 2.5589            | 2.5631                  | 0.9427             | 1.0695                  | 1.0331        | 0.9353                  | 0.4584        | 0.2197                  | 0.5237            | 0.3567                  | 1.0299             | 0.8208                  | 0.9729        | 0.9999                  | 0.7376        | 0.8114                  | 2.5417            | 2.5418                  |
| Mean 2 | 0.9637             | 1.0139                  | 2.0862        | 1.6664                  | 1.1881        | 1.1296                  | 2.3572            | 2.5647                  | 1.0417             | 1.002                   | 1.0815        | 1.0968                  | 0.4393        | 0.275                   | 0.5693            | 0.457                   | 1.0097             | 0.9776                  | 0.9851        | 1.0478                  | 0.7182        | 0.6759                  | 2.5727            | 2.3531                  |
| Mean 3 | 0.9923             | 1.0344                  | 1.5254        | 1.4636                  | 1.0609        | 1.1807                  | 2.2458            | 2.2465                  | 1.0157             | 1.0215                  | 0.9968        | 0.964                   | 0.5029        | 0.2735                  | 0.5758            | 0.3999                  | 0.9604             | 0.8271                  | 1.0413        | 0.9984                  | 0.8017        | 0.7677                  | 2.6963            | 2.4537                  |

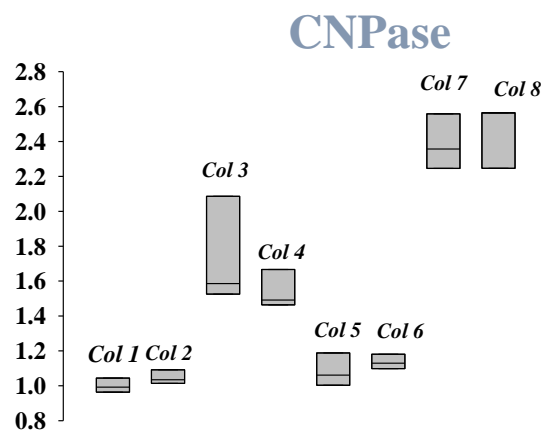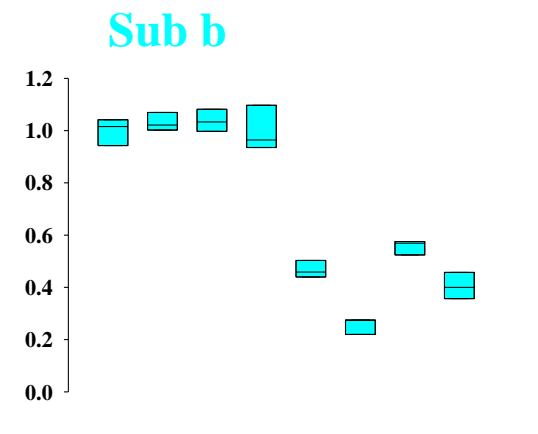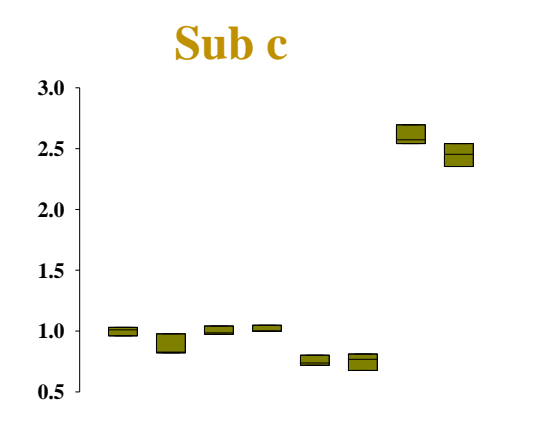

One Way Analysis of Variance All Pairwise Multiple Comparison Procedures (Student-Newman-Keuls Method) :

| Comparison      | Diff of Means | P<0.050 |
|-----------------|---------------|---------|
| Col 3 vs. Col 1 | 0.732         | Yes     |
| Col 5 vs. Col 1 | 0.084         | No      |
| Col 7 vs. Col 1 | 1.387         | Yes     |
| Col 7 vs. Col 5 | 1.303         | Yes     |
| Col 4 vs. Col 2 | 0.494         | Yes     |
| Col 6 vs. Col 2 | 0.0897        | No      |
| Col 8 vs. Col 2 | 1.412         | Yes     |
| Col 8 vs. Col 6 | 1.322         | Yes     |

| Comparison      | Diff of Means | P<0.050 |
|-----------------|---------------|---------|
| Col 3 vs. Col 1 | 0.0371        | No      |
| Col 5 vs. Col 1 | 0.533         | Yes     |
| Col 7 vs. Col 1 | 0.444         | Yes     |
| Col 7 vs. Col 5 | 0.0893        | Yes     |
| Col 4 vs. Col 2 | 0.0323        | No      |
| Col 6 vs. Col 2 | 0.775         | Yes     |
| Col 8 vs. Col 2 | 0.626         | Yes     |
| Col 8 vs. Col 6 | 0.148         | Yes     |

| Comparison      | Diff of Means | P<0.050 |
|-----------------|---------------|---------|
| Col 3 vs. Col 1 | 0.000275      | No      |
| Col 5 vs. Col 1 | 0.248         | Yes     |
| Col 7 vs. Col 1 | 1.604         | Yes     |
| Col 7 vs. Col 5 | 1.851         | Yes     |
| Col 4 vs. Col 2 | 0.14          | No      |
| Col 6 vs. Col 2 | 0.124         | Yes     |
| Col 8 vs. Col 2 | 1.574         | Yes     |
| Col 8 vs. Col 6 | 1.698         | Yes     |
